# Supplementary material for: Electrochemical determination of trace sulfur containing compounds in model fuel based on a silver/polyaniline-modified electrode
Source: Royal Society of Chemistry journal article supplement (doi:10.1039/c9ay02382h), 2020-01-01
Supplement: c9ay02382h1.pdf [file c9ay02382h1.pdf]

## Electrochemical determination of trace sulfur containing compounds in model fuel based on silver/polyaniline-modified electrode

Siyabonga Shoba<sup>1</sup>, Owolabi M. Bankole<sup>1</sup> and Adeniyi. S. Ogunlaja<sup>1\*</sup>

<sup>1</sup>Department of Chemistry, Nelson Mandela University, PO Box 77000, Port Elizabeth, 6031, South Africa

### Supplementary Data Section

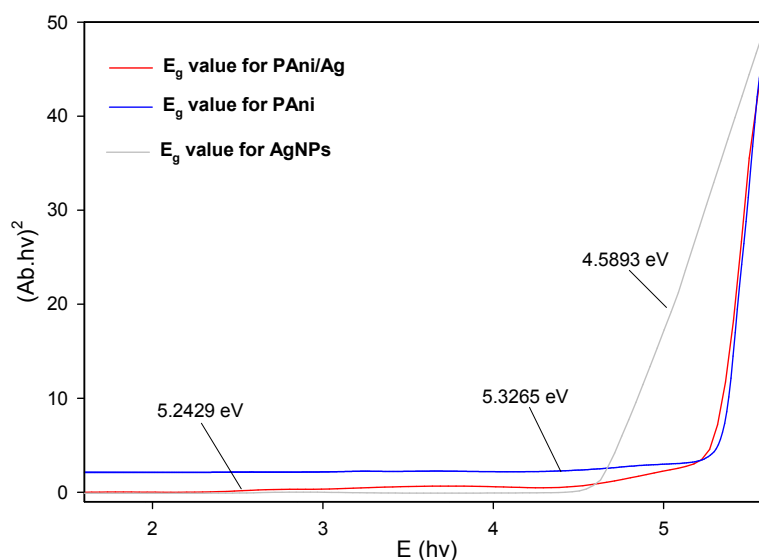

**Fig. S1.** Graphs showing the various energy gap ( $E_g$ )<sub>opt</sub> of Ag, PANi and PANi/Ag.

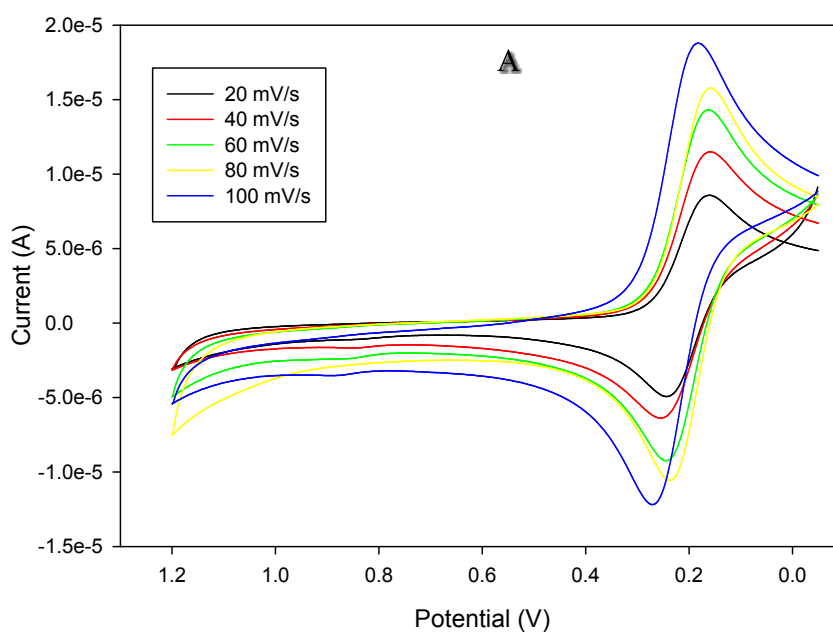

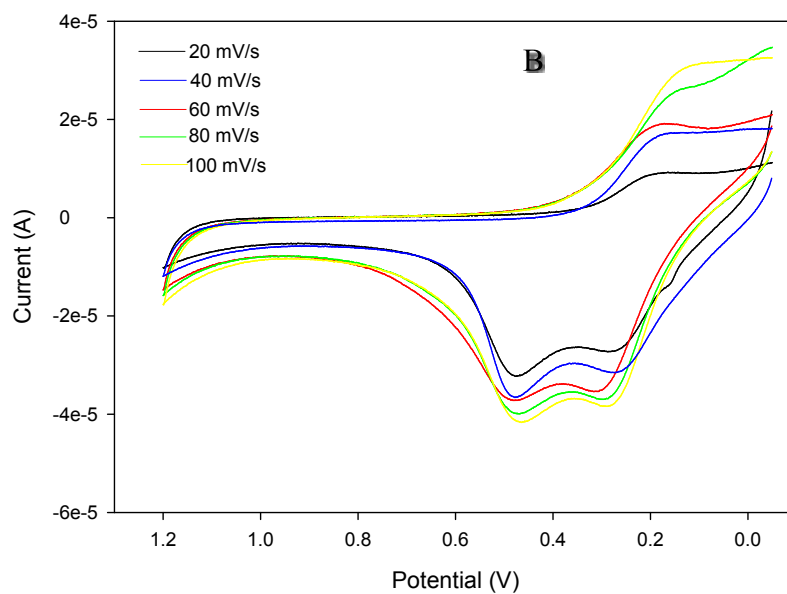

Fig S2. Graphs showing the CV at various scan rate of 20, 40, 60, 80 and 100 mV/sec using (A) GCE/PAni and (B) GCE/PAni/Ag electrode

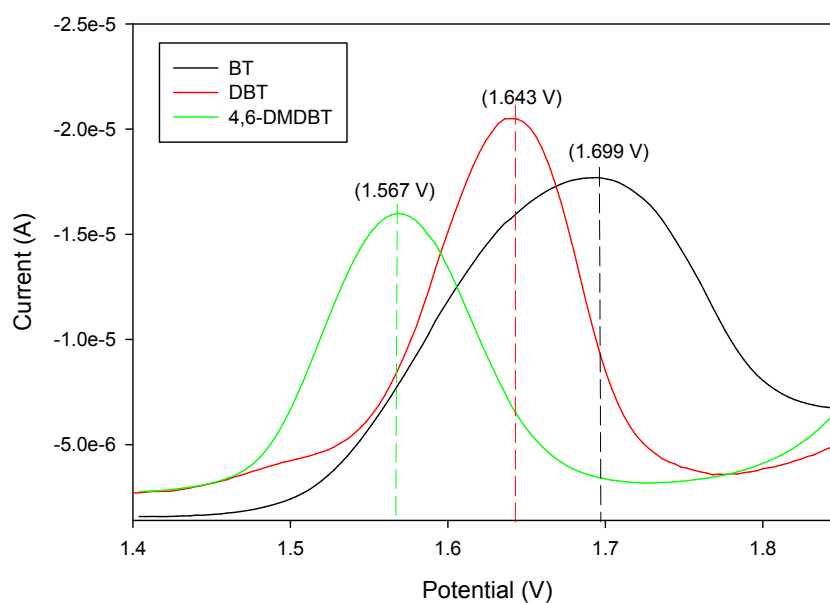

Fig. S3. Differential Pulse Voltammetry of BT, DBT and 4,6-DMDBT (10 ppm) at scan rate of 50 mV/sec showing various oxidation potentials.

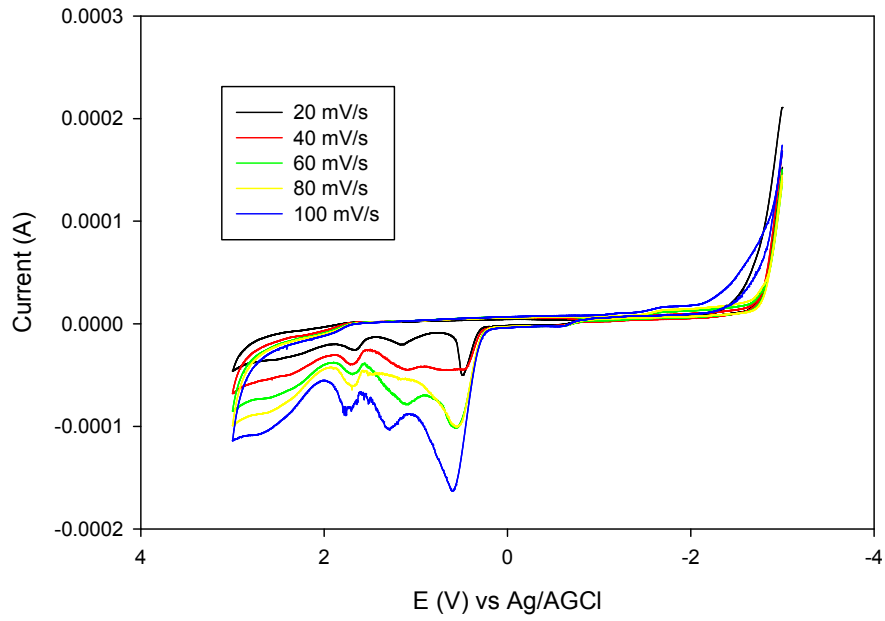

**Fig. S4.** Graph of peak current (mA) versus scan rate ( $\text{mVs}^{-1}$ ) for 30 mg/L BT in acetonitrile.

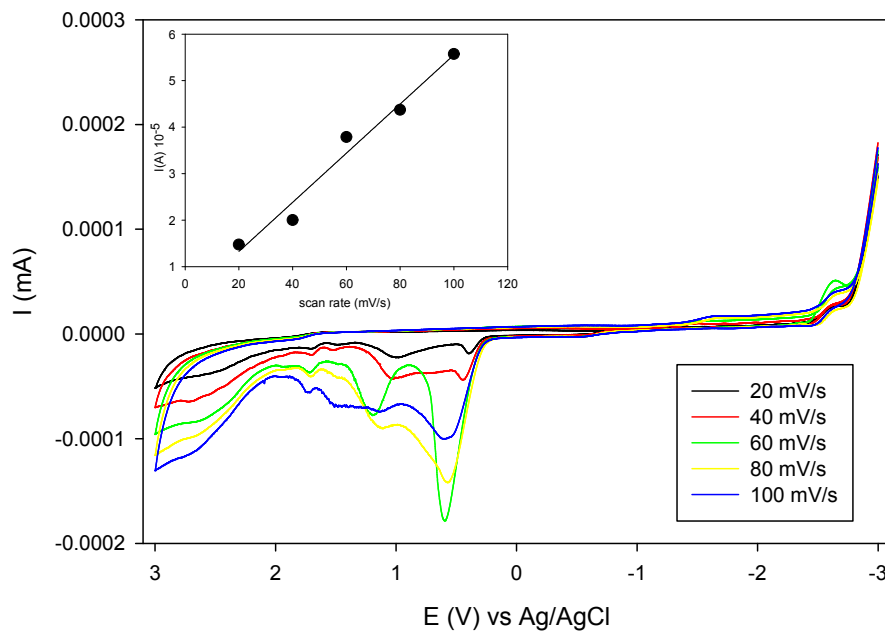

**Fig. S5.** Graph of peak current (mA) versus scan rate ( $\text{mVs}^{-1}$ ) for 30 mg/L DBT in acetonitrile.

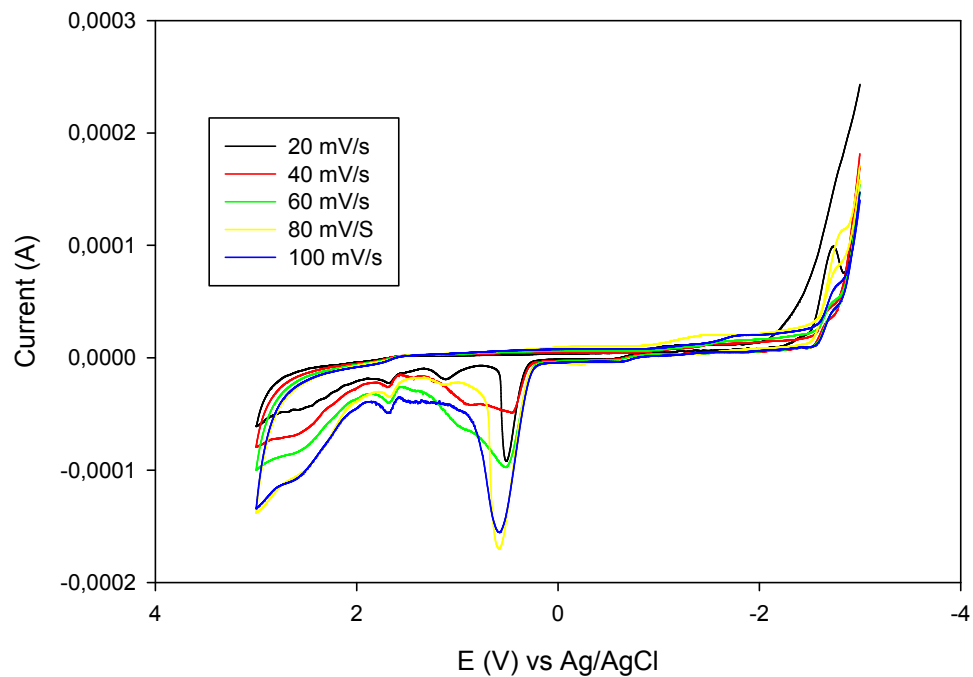

**Fig. S6.** Graph of peak current (mA) versus scan rate ( $\text{mVs}^{-1}$ ) for 30 mg/L 4,6-DMDBT in acetonitrile.

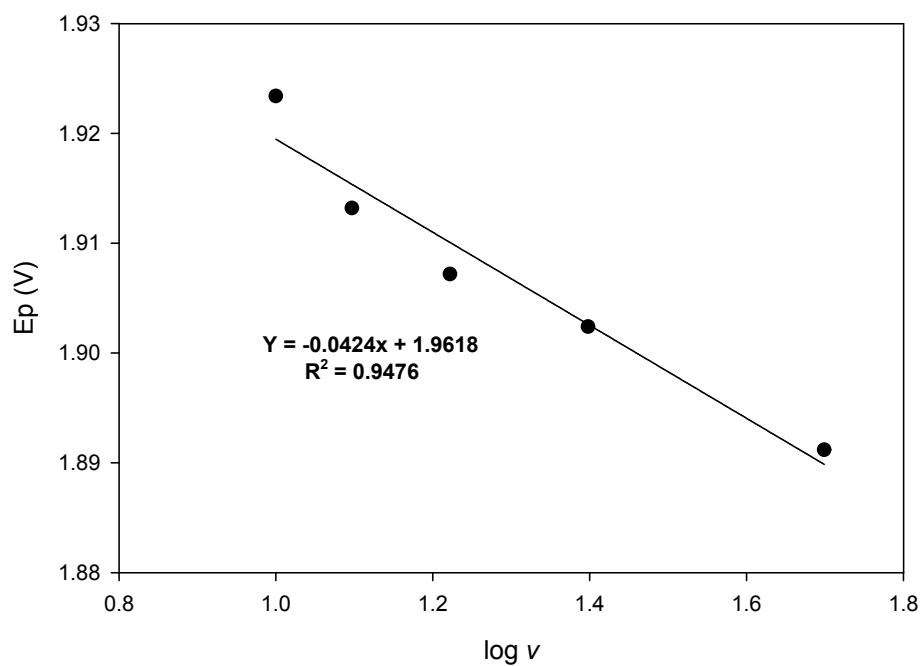

**Fig. S7.** Graph of  $E_p$  (V) vs.  $\log v$  for BT.

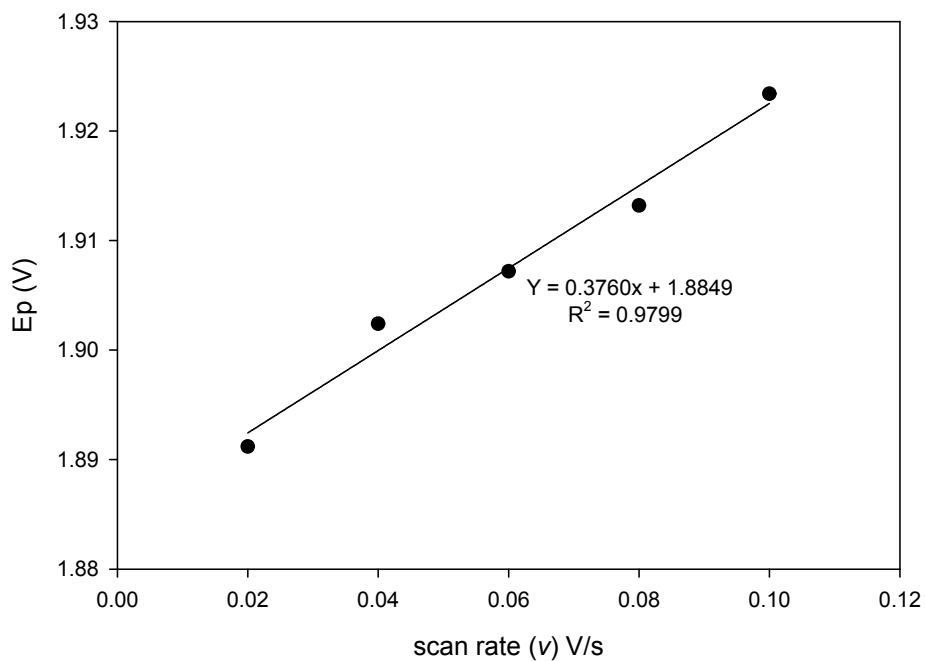

**Fig. S8.** Graph of  $E_p$  (V) vs.  $\nu$  (V/s) for BT.

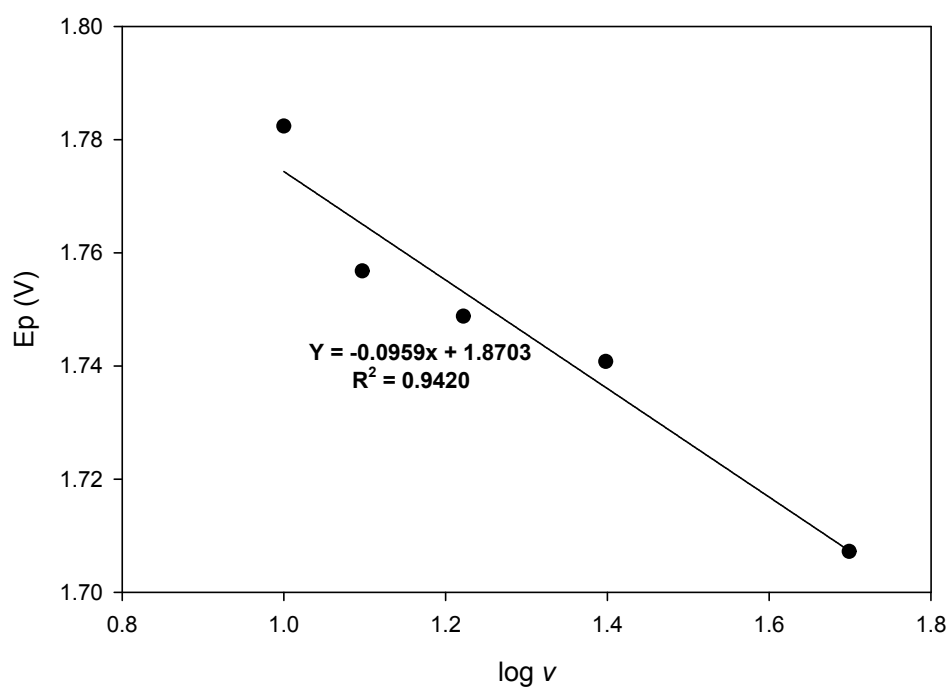

**Fig. S9.** Graph of  $E_p$  (V) vs.  $\log \nu$  for DBT.

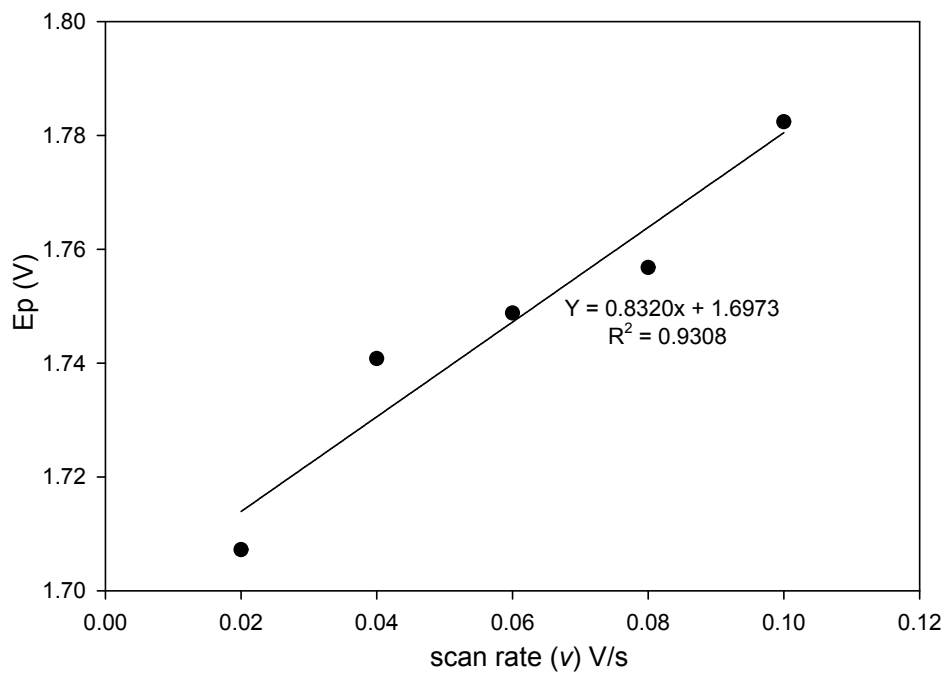

**Fig. S10.** Graph of  $E_p$  (V) vs.  $v$  (V/s) for DBT.

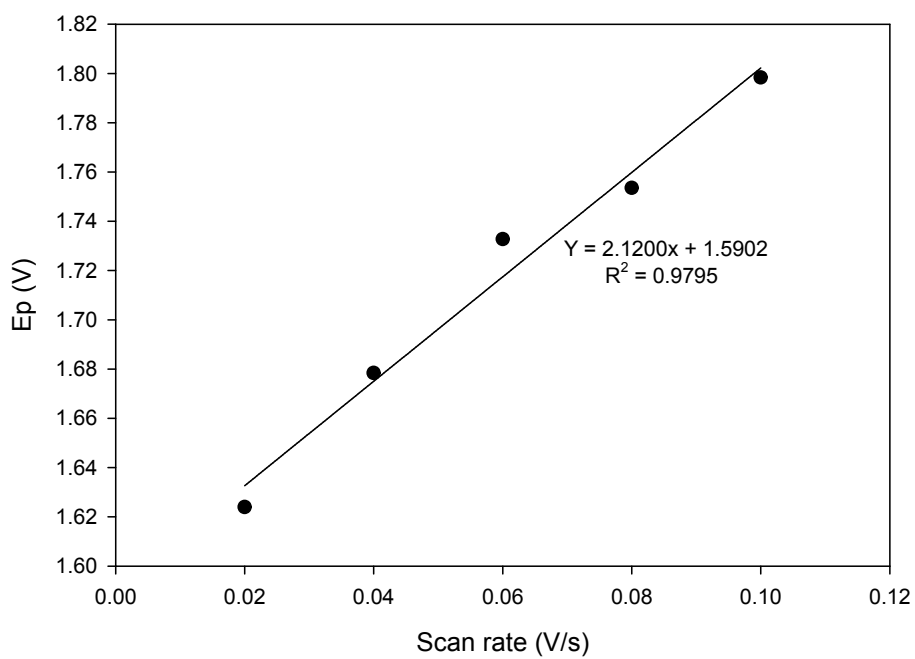

**Fig. S11.** Graph of  $E_p$  (V) vs.  $v$  (V/s) for 4,6-DMDBT.

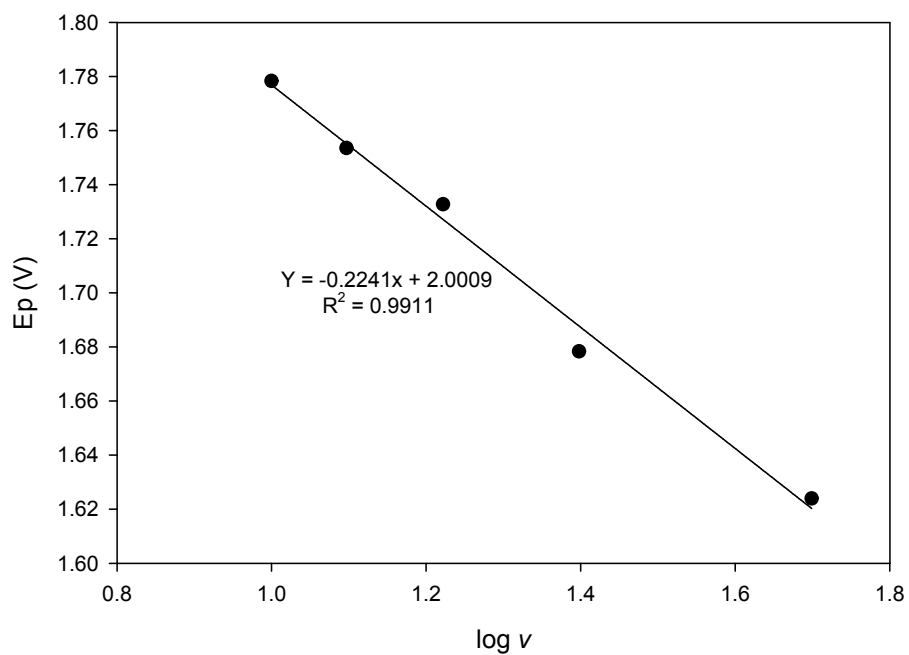

**Fig. S12.** Graph of  $E_p$  (V) vs.  $\log v$  for 4,6-DMDBT.

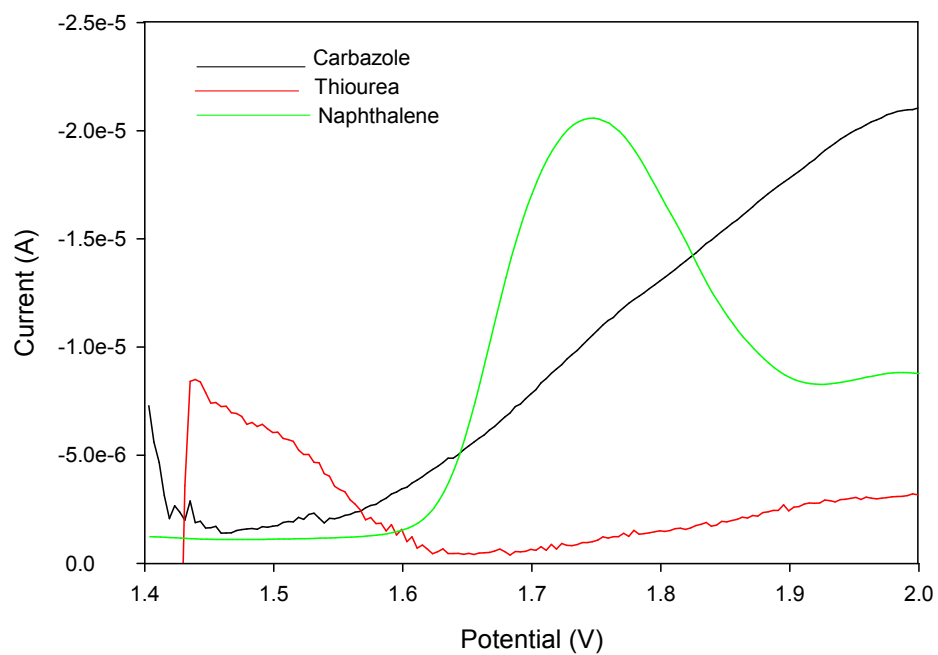

**Fig. S13.** DPV of carbazole, thiourea and naphthalene (100 ppm) in the range of 1.4 to 2.0 V.

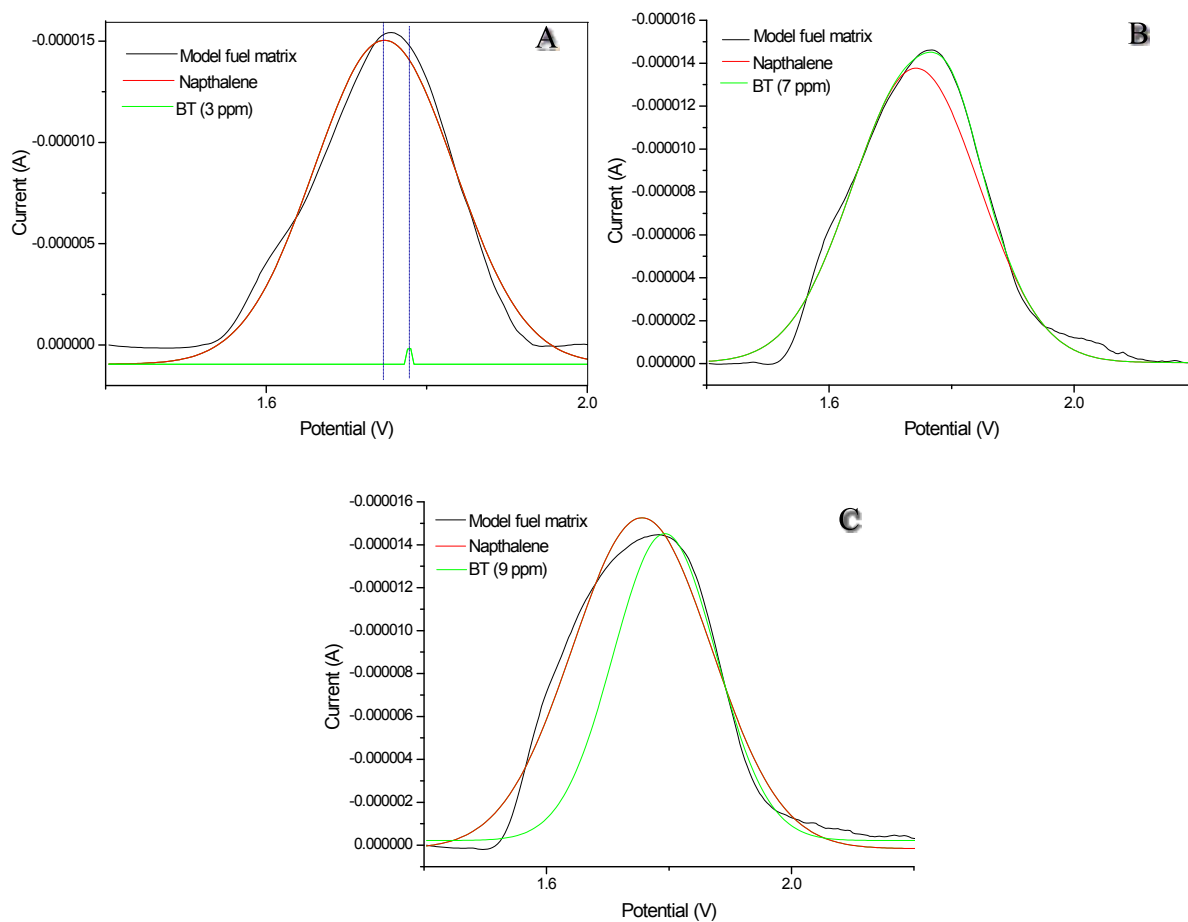

**Fig. S14.** DPV of model fuel (thiourea (100 ppm), carbazole (100 ppm), and naphthalene (10 ppm)) having benzothiofene concentration of (A) 3 ppm (0.72 ppmS); (B) 7 ppm (1.68 ppmS) and (C) 9 ppm (2.16 ppmS).



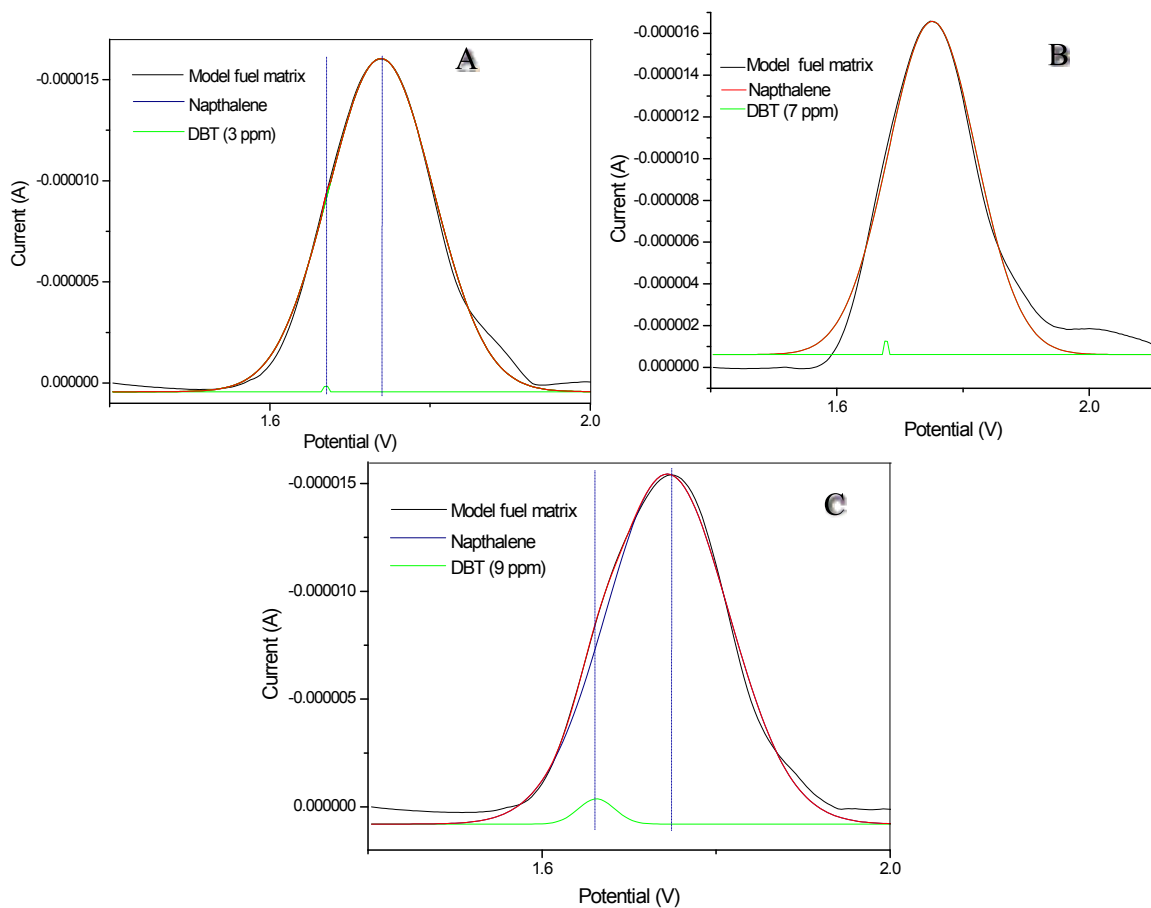

**Fig. S15.** DPV of model fuel (thiourea (100 ppm), carbazole (100 ppm), and naphthalene (10 ppm)) having dibenzothiophene concentration of (A) 3 ppm (0.51 ppmS); (B) 7 ppm (1.19 ppmS) and (C) 9 ppm (1.53 ppmS).

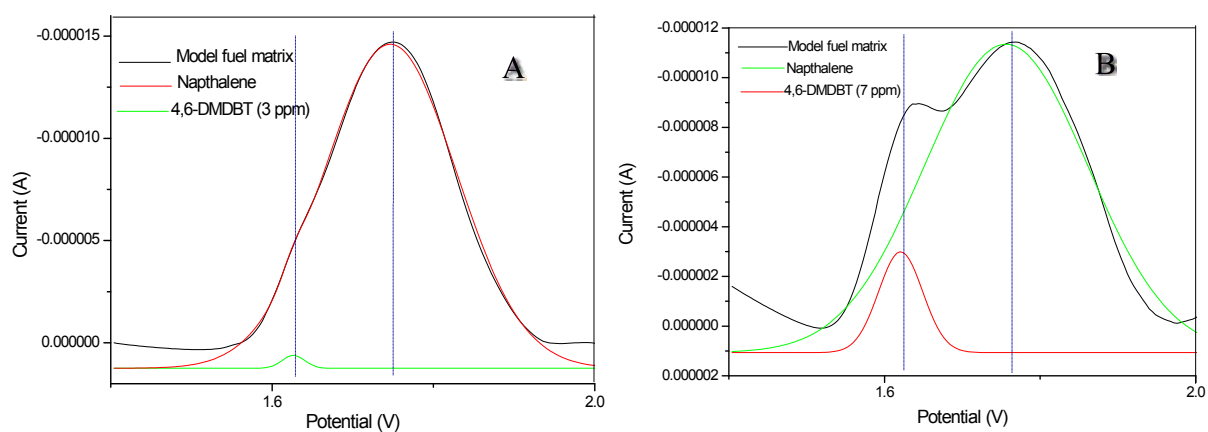

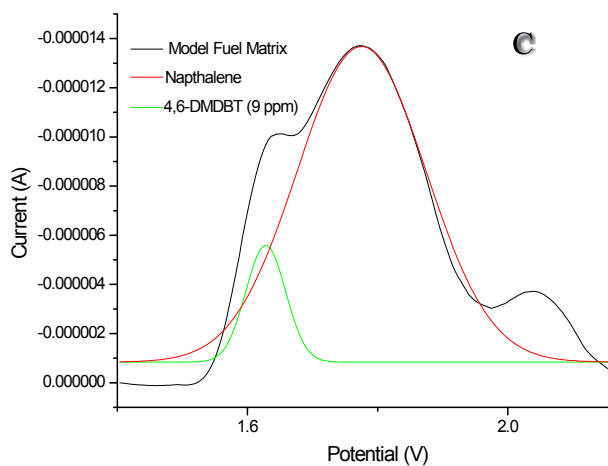

**Fig. S16.** DPV of model fuel thiourea (100 ppm), carbazole (100 ppm), and naphthalene (10 ppm) having 4,6-dimethyl dibenzothiophene concentration of (A) 3 ppm (0.45 ppmS), (B) 7 ppm (1.05 ppmS) and (C) 9 ppm (1.35 ppmS).

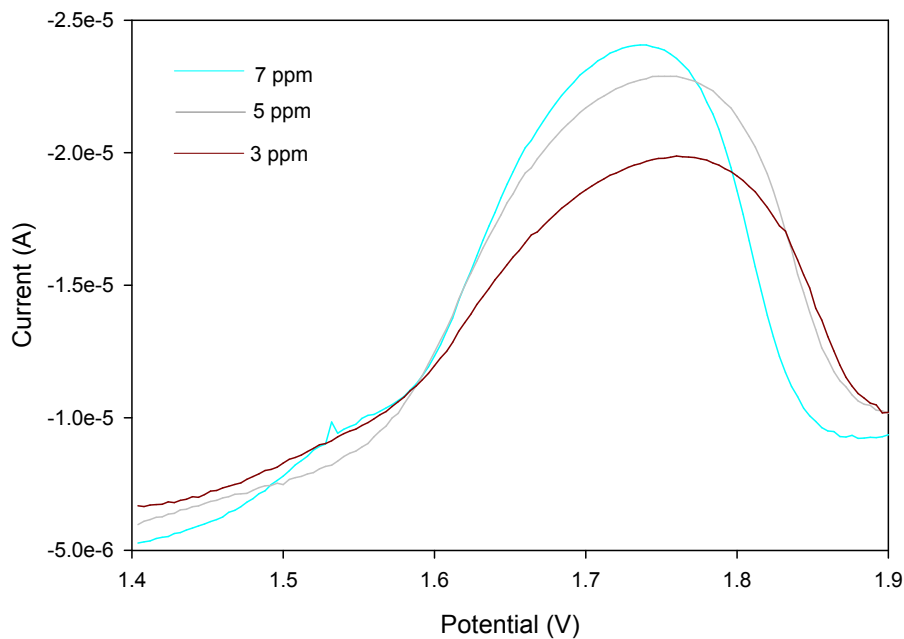

**Fig. S17.** DPV of various concentrations of BT (3, 5 and 7 ppm) in thiourea (100 ppm), carbazole (100 ppm), and naphthalene (10 ppm) at scan rate of 50 mV/sec.

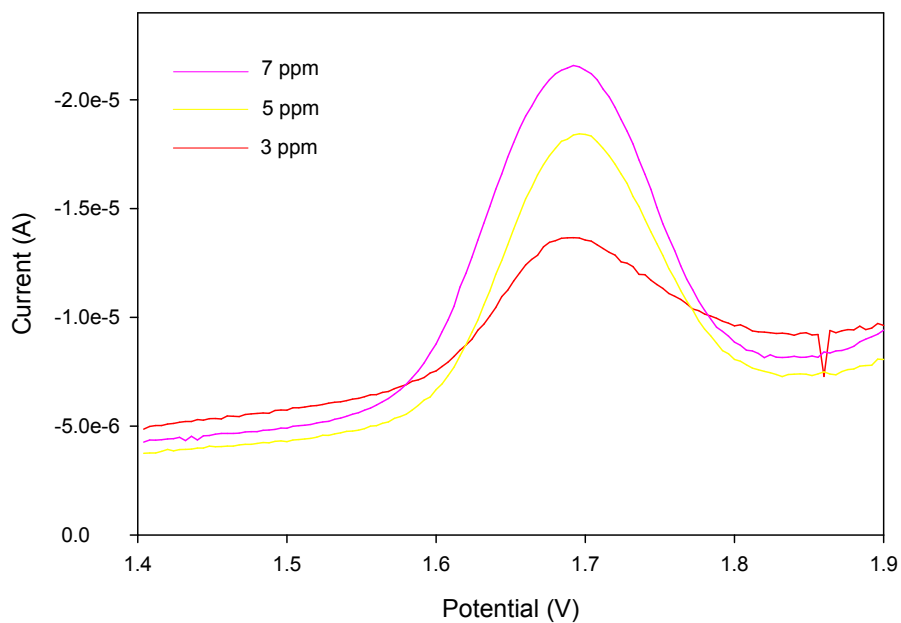

**Fig. S18.** DPV of various concentrations of DBT (3, 5 and 7 ppm) in thiourea (100 ppm), carbazole (100 ppm), and naphthalene (10 ppm) at scan rate of 50 mV/sec.

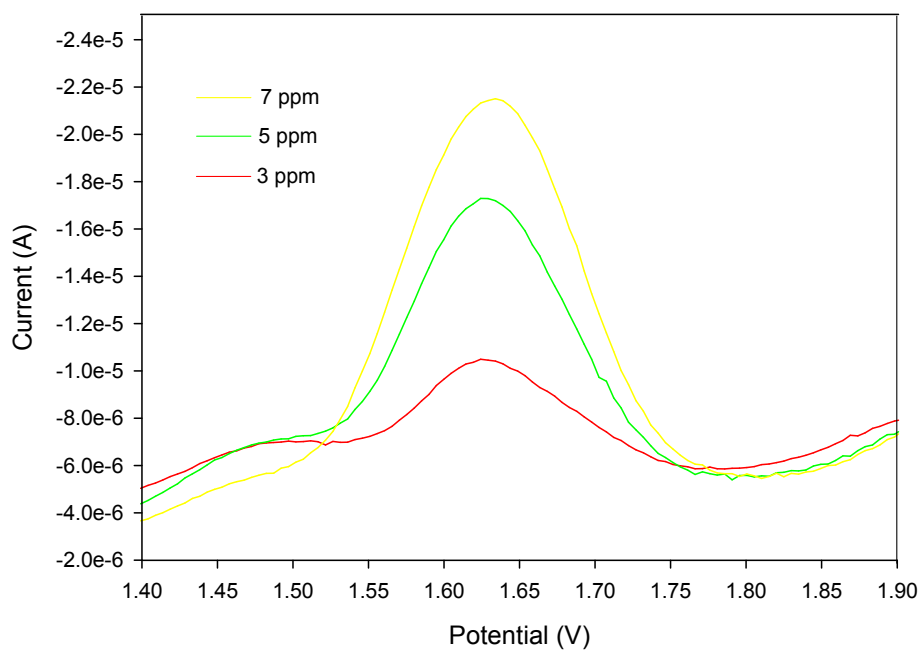

**Fig. S19.** DPV of various concentrations of 4,6-DMDBT (3, 5 and 7 ppm) in thiourea (100 ppm), carbazole (100 ppm), and naphthalene (10 ppm) at scan rate of 50 mV/sec.

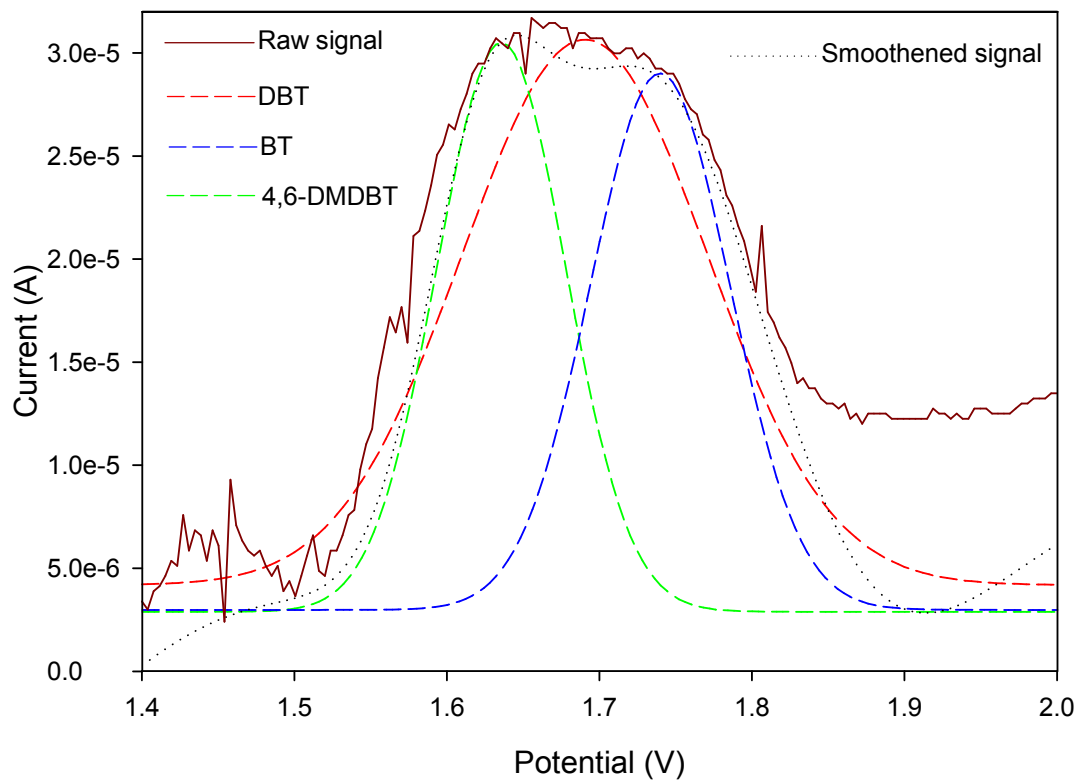

**Fig. S20.** Deconvoluted DPV scan showing the region where BT, DBT and 4,6-DMDBT are present in the spiked oil (10 ppm). Smoothened baseline signal was corrected prior to the deconvolution.

|                  | <b>BT (<math>\mu\text{A}</math>)</b> | <b>DBT (<math>\mu\text{A}</math>)</b> | <b>4,6-DMDBT (<math>\mu\text{A}</math>)</b> |
|------------------|--------------------------------------|---------------------------------------|---------------------------------------------|
| 5 ppm (STANDARD) | 8.5                                  | 9.0                                   | 8.9                                         |
| 7 ppm (STANDARD) | 11.4                                 | 11.5                                  | 10.9                                        |
| ULS + 5 ppm      | 8.1                                  | 10                                    | 7.9                                         |
| ULS + 7 ppm      | 12                                   | 12.5                                  | 11.2                                        |
|                  | % Recovery                           | % Recovery                            | % Recovery                                  |
| % (ULS + 5 ppm)  | 95.3                                 | 108.7                                 | 90.5                                        |
| % (ULS + 7 ppm)  | 104.3                                | 107.8                                 | 101.8                                       |
